# Supplementary material for: A framework for understanding the bioconcentration of surfactants in fish
Source: Royal Society of Chemistry journal article supplement (doi:10.1039/d3em00070b), 2023-01-01
Supplement: d3em00070b1.xlsx [file d3em00070b1.xlsx]

## Sheet: Framework demo
Supporting information for:
A framework for understanding the bioconcentration of surfactants in fish
Michael S. McLachlan, Andrea Ebert, James M. Armitage, Jon A. Arnot and Steven T. J. Droge
Illustrative calculations for the framework
Parameters									Framework calculations
Symbol	Description	Value	Unit	Source					Surfactant	pKa	log fNW	log DMLW	log fNB	Resistance for gill uptake (h m-1)				kU (L h-1 kg-1)	Resistance for gill elimination (h m-1)				DFW (L kg-1)	k2 (h-1)	kB (h-1)	kT (h-1)	BCF (L kg-1)
				(for reference list see SI-1)					class					blood	membrane	water	Total		blood	membrane	water	Total
	pH gill water	7							Anionic	-1	-8	3	-9.12	1.12817	6028.05	10.1876	6039.36	0.0445984	14.8722	6199.74	134.298	6348.91	54.0625	0.000784721	0.233973	0.234758	0.189976
	pH blood	8.12		Erickson et al. (2006)					Cationic	10	-3.00043	3	-1.88569	193.697	2.01294	10.1876	205.897	1.30816	14.8722	0.154602	0.782211	15.809	54.0625	0.315144	0.233973	0.549117	2.38229
M	fish mass	0.01	kg						Nonionic	-	0	3	0	14.8722	0.00201158	10.1876	25.0618	10.7473					25	0.429891	0.233973	0.663864	16.189
AG/M	specific gill surface area	0.269346	m2/kg	Hughes (1984)
AG	gill surface area	0.00269346	m2
QW	water flow through gills	0.000264387	m3 h-1	Arnot and Gobas 2004
QBG	blood flow through gills	2.26384e-05	m3 h-1	correlation from Erickson et al. 2006
fPL-B	fraction of polar lipids in blood	0.007	kg L-1	see Text S3
Cox	oxygen conc in water for calculating QW	11.058	mg L-1	equation from Arnot and Gobas 2004, using 10 °C, 95% O2 saturation
fML-F	fraction of fish fresh weight that is membrane lipid	0.0125	kg kg-1	Droge et al. (2021)
fAML-F	fraction of membrane lipid that is anionic phospholipids	0.175	kg kg-1	Schmitt 2008
	quotient of partition coefficient to anionic phospholipids/neutral phospholipids	20		Schmitt 2008
PPC	permeability for paracelular transport	4.47e-06	cm s-1	Bittermann and Goss 2017, geometric mean of data in SI, multiplied by 3 to account for thinner membrane thickness of gills vs Caco-2 cells used by Bittermann
	""	0.00016092	m h-1
fLF	fraction of fish fresh weight that is lipid	0.05	kg kg-1	default
	19.5
